# Supplementary material
Source: PubMed Central journal article supplement (PMC4207551)
Supplement: jp502716m_si_001.pdf [file jp502716m_si_001.pdf]

# Atomistic Models of General Anesthetics for use in *In Silico* Biological Studies

Mark J. Arcario, Christopher G. Mayne, and Emad Tajkhorshid\*

*Center for Biophysics and Computational Biology, Departments of Biochemistry, College of  
Medicine, and Beckman Institute for Advanced Science and Technology, University of  
Illinois at Urbana-Champaign, Urbana, Illinois 61801, USA*

E-mail: [emad@life.illinois.edu](mailto:emad@life.illinois.edu)

Phone: +1 (217) 244-6914. Fax: +1 (217) 244-6078

---

\*To whom correspondence should be addressed

**Table S1: Summary of Recent Molecular Dynamics Simulations Utilizing Anesthetics**

| Summary                                                                                   | Anesthetic              | Force Field | Parameter Reference |
|-------------------------------------------------------------------------------------------|-------------------------|-------------|---------------------|
| Interaction of Propofol with an apoferritin dimer <sup>1</sup>                            | Propofol                | CHARMM      | —                   |
| Parameterization of Isoflurane and free energy of binding to apoferritin <sup>2</sup>     | Isoflurane              | CHARMM      | —                   |
| Interaction of Halothane with $\alpha 4\beta 2$ nAChR model <sup>3</sup>                  | Halothane               | CHARMM      | <sup>4</sup>        |
| Flooding of GLIC with Isoflurane <sup>5</sup>                                             | Isoflurane              | CHARMM      | <sup>2</sup>        |
| Dynamics of GLIC with bound Isoflurane <sup>6</sup>                                       | Isoflurane              | CHARMM      | <sup>2</sup>        |
| Free energy of Propofol binding to GLIC <sup>7</sup>                                      | Propofol                | CHARMM      | —                   |
| Effect of Propofol Stoichiometry on GLIC dynamics <sup>8</sup>                            | Propofol                | CHARMM      | —                   |
| Testing the effects of Propofol on GLIC mutants <sup>9</sup>                              | Propofol                | CHARMM      | <sup>8</sup>        |
| Flooding of voltage-gated Na <sup>+</sup> channel, NaChBac, with Isoflurane <sup>10</sup> | Isoflurane              | CHARMM      | <sup>2</sup>        |
| Free energy of binding to GLIC and GLIC mutants <sup>11</sup>                             | Desflurane<br>Halothane | GROMOS      | —                   |
| Flooding of Na <sup>+</sup> channel, NaChBac, with Sevoflurane <sup>12</sup>              | Sevoflurane             | CHARMM      | —                   |

A literature search for articles published within the last 5 years was conducted in PubMed using the keywords “desflurane”, “isoflurane”, “sevoflurane”, “propofol”, “anesthesia”, and “anesthetic” in conjunction with “molecular dynamics”. Here, the title of the article is presented along with the anesthetic used and force field. Those entries with “—” in “Parameter Reference” signify that the parameters used in the paper were developed in the same study.

**Table S2: Comparison of Computed Physicochemical Properties Employing Previously Parameterized Models and Those Developed in this Study.**

| Anesthetic              |          | Dipole (D)    | Density (g/mL)    | $\Delta H_{\text{vap}}$ (kcal/mol) |
|-------------------------|----------|---------------|-------------------|------------------------------------|
| Isoflurane <sup>a</sup> | Previous | 1.38 (-44.5%) | 1.53±0.01 (2.7%)  | 8.48±0.03 (11.43%)                 |
|                         | Present  | 2.91 (17.8%)  | 1.48±0.02 (-0.7%) | 8.03±0.01 (5.5%)                   |
| Propofol <sup>b</sup>   | Previous | 2.02 (26.3%)  | 0.93±0.01 (9.7%)  | 15.82±0.02 <sup>c</sup>            |
|                         | Present  | 1.92 (20%)    | 0.98±0.01 (-4.8%) | 16.27±0.05                         |

Calculated values for dipole moment, density and heat of vaporization are presented for both the previously parameterized model (Previous) and the currently developed models (Present) with the percent error from experimental values shown in parenthesis. The geometry optimized molecule with the optimized charge distribution was utilized to calculate the dipole moment. Again, it should be noted that the values for the *in silico* models should be 10-20% higher than experimental measurements to reproduce condensed phase properties. The density and heat of vaporization are presented mean±S.D. calculated across five replicates.

*a.* Calculated physicochemical properties are done using the parameters from Hénin, *et al.*<sup>2</sup>

*b.* Calculated physicochemical properties are done using the parameters from LeBard, *et al.*<sup>7</sup>

*c.* Due to the high boiling point of propofol (529K), the heat of vaporization varies widely as discussed in the Results section.

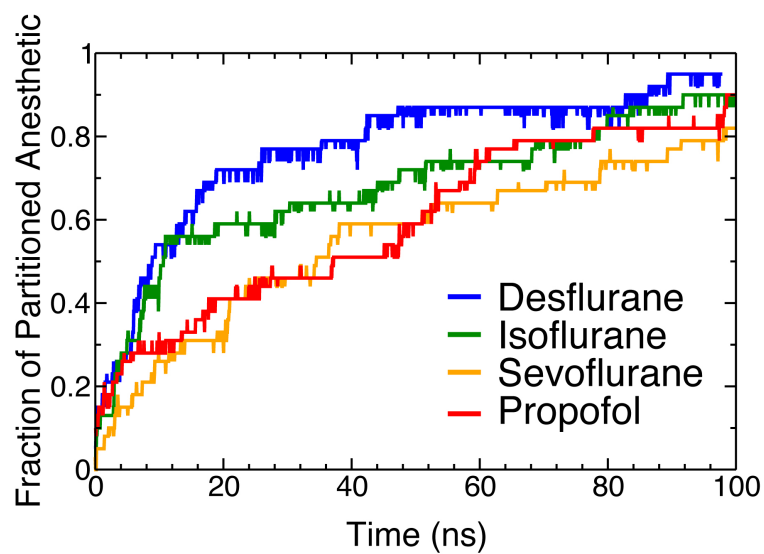

Figure S1: Plot of the fraction of desflurane (blue), isoflurane (green), sevoflurane (orange), and propofol (red) partitioned into the POPC membrane as a function of time.

## References

- (1) Vedula, L. S.; Brannigan, G.; Economou, N. J.; Xi, J.; Hall, M. A.; Liu, R.; Rossi, M. J.; Dailey, W. P.; Grasty, K. C.; Klein, M. L. et al. A Unitary Anesthetic Binding Site at High Resolution. *J. Biol. Chem.* **2009**, *284*, 24176–24184.
- (2) Hénin, J.; Brannigan, G.; Dailey, W. P.; Eckenhoff, R.; Klein, M. L. An Atomistic Model for Simulations of the General Anesthetic Isoflurane. *J. Phys. Chem. B* **2010**, *114*, 604–612.
- (3) Willenbring, D.; Xu, Y.; Tang, P. The Role of Structured Water in Mediating General Anesthetic Action on  $\alpha 4\beta 2$  nAChR. *Phys. Chem. Chem. Phys.* **2009**, *12*, 10263–10269.
- (4) Liu, Z.; Xu, Y.; Saladino, A. C.; Wymore, T.; Tang, P. Parameterization of 2-Bromo-2-Chloro-1,1,1-Trifluoroethane (halothane) and Hexfluoroethane for Nonbonded Interactions. *J. Phys. Chem. A* **2004**, *108*, 781–786.
- (5) Brannigan, G.; LeBard, D. N.; Hénin, J.; Eckenhoff, R. G.; Klein, M. L. Multiple Binding Sites for the General Anesthetic Isoflurane Identified in the Nicotinic Acetylcholine Receptor Transmembrane Domain. *Proc. Natl. Acad. Sci. USA* **2010**, *107*, 14122–14127.
- (6) Willenbring, D.; Liu, L. T.; Mowrey, D.; Xu, Y.; Tang, P. Isoflurane Alters the Structure and Dynamics of GLIC. *Biophys. J.* **2011**, *101*, 1905–1912.
- (7) LeBard, D. N.; Hénin, J.; Eckenhoff, R. G.; Klein, M. L.; Brannigan, G. General Anesthetics Predicted to Block the GLIC Pore with Micromolar Affinity. *PLoS Comput. Biol.* **2012**, *8*, e1002532.
- (8) Mowrey, D.; Cheng, M. H.; Liu, L. T.; Willenbring, D.; Lu, X.; Wymore, T.; Xu, Y.;

- Tang, P. Asymmetric Ligand Binding Facilitates Conformational Transitions in Pentameric Ligand-Gated Ion Channels. *J. Am. Chem. Soc.* **2013**, *135*, 2172–2180.
- (9) Tillman, T.; Cheng, M. H.; Chen, Q.; Tang, P.; Xu, Y. Reversal of Ion-Charge Selectivity Renders the Pentameric Ligand-Gated Ion Channel GLIC Insensitive to Anaesthetics. *Biochem. J.* **2013**, *449*, 61–68.
- (10) Raju, S. G.; Barber, A. F.; LeBard, D. N.; Klein, M. L.; Carnevale, V. Exploring Volatile General Anesthetic Binding to a Closed Membrane-Bound Bacterial Voltage-Gated Sodium Channel Via Computation. *PLoS Comput. Biol.* **2013**, *9*, e1003090.
- (11) Brömstrup, T.; Howard, R. J.; Trudell, J. R.; Harris, R. A.; Lindahl, E. Inhibition Versus Potentiation of Ligand-Gated Ion Channels Can Be Altered by a Single Mutation That Moves Ligands Between Intra- and Intersubunit Sites. *Structure* **2013**, *21*, 1307–1316.
- (12) Barber, A. F.; Carnevale, V.; Klein, M. L.; Eckenhoff, R. G.; Covarrubias, M. Modulation of a Voltage-Gated Na<sup>+</sup> Channel by Sevoflurane Involves Multiple Sites and Distinct Mechanisms. *Proc. Natl. Acad. Sci. USA* **2014**, *111*, 6726–6731.
